# Supplementary material for: Clinical evaluation of lateral flow Mologic malaria P.f Ag (LDH) Rapid Diagnostic Test diagnostic accuracy: A cross-sectional study, Sudan 2020-2021
Source: Research Square preprint supplement (doi:10.21203/rs.3.rs-7124055/v1), 2025-07-29
Supplement: Supplementary file 1 [file 7cd3167106068bd089104211.xlsx]

## Sheet: Sheet1
patient ID	site	abdominal pain	sweats	dizziness	chills	nausea	stomachache	fatigue	fever	cough	dysuria	headache	diarrhea	vomiting	rash	conjuctival redness	others
MA013130191	GS	1	1	0	1	1	1	1	1	0	0	1	0	0	0	0	0
MA013130192	SOR	0	0	1	1	1	0	1	1	1	0	1	0	0	0	0	0
MA013130193	GS	0	0	0	1	1	1	1	1	1	1	1	0	0	0	0	0
MA013130194	SOR	1	1	1	1	1	1	1	1	1	1	1	0	1	0	0	joint pain
MA013130195	GS	0	0	0	1	1	1	1	1	0	0	0	0	1	0	0	0
MA013130196	SOR	1	1	1	1	1	1	1	1	0	0	1	0	1	0	0	0
MA013130197	GS	1	0	0	0	1	0	1	1	0	0	1	0	0	0	0	0
MA013130198	SOR	1	1	0	1	1	0	1	1	0	0	1	0	1	0	0	0
MA013130199	GS	1	1	0	0	0	0	1	1	0	0	1	0	0	0	0	0
MA013130200	SOR	1	1	1	1	1	1	1	1	0	1	1	0	1	0	1	0
MA013130201	GS	1	1	1	0	1	0	1	1	1	0	1	0	0	0	0	0
MA013130202	SOR	1	1	1	1	1	1	1	1	0	0	1	0	1	0	0	joint pain
MA013130203	GS	1	0	1	0	1	0	1	0	0	1	0	1	1	0	0	0
MA013130204	SOR	0	0	0	0	1	0	1	1	1	0	1	1	1	0	0	joint pain
MA013130205	GS	1	1	1	1	0	0	1	1	1	1	1	0	0	0	0	0
MA013130206	SOR	1	0	0	0	1	0	1	1	0	0	1	1	1	0	0	0
MA013130207	GS	1	0	1	0	1	0	0	1	0	1	1	0	0	0	0	0
MA013130208	SOR	0	1	0	1	1	0	1	1	1	0	1	0	0	0	0	0
MA013130209	GS	1	1	1	1	1	0	1	1	0	0	1	0	0	0	0	0
MA013130210	SOR	1	0	0	0	1	1	1	1	0	0	1	1	0	0	0	0
MA013130211	GS	0	0	0	1	1	1	1	1	0	0	1	0	0	0	0	0
MA013130212	SOR	0	1	0	1	1	0	1	1	1	0	1	0	1	0	0	0
MA013130213	GS	0	0	0	1	1	0	1	1	0	0	1	0	0	0	0	0
MA013130214	SOR	1	1	0	0	1	0	1	1	0	0	1	0	0	0	0	0
MA013130215	GS	0	1	1	1	1	0	1	1	1	1	1	0	0	0	0	0
MA013130216	SOR	0	0	1	0	1	1	1	1	0	0	1	0	1	0	0	0
MA013130217	GS	1	0	0	1	1	0	1	1	0	0	1	0	1	0	0	0
MA013130218	SOR	0	1	1	0	1	1	1	1	1	0	1	0	0	0	0	0
MA013130219	GS	0	0	0	1	1	1	1	1	0	0	1	0	1	0	0	0
MA013130220	SOR	0	0	0	0	1	0	1	1	1	1	1	0	1	0	0	0
MA013130221	GS	0	0	0	1	1	0	1	1	1	1	1	0	0	0	0	0
MA013130222	SOR	1	0	0	0	1	0	1	1	0	0	1	0	1	0	0	0
MA013130223	GS	0	0	1	0	0	1	1	1	1	0	1	0	0	0	0	0
MA013130224	SOR	0	1	0	1	0	0	1	1	0	0	1	0	0	0	0	0
MA013130225	GS	1	1	1	1	1	0	1	1	1	1	1	0	1	0	0	0
MA013130226	SOR	0	0	0	0	1	0	1	1	1	0	1	0	0	0	0	0
MA013130227	GS	0	1	0	1	1	0	1	1	0	1	1	1	1	0	0	0
MA013130228	SOR	1	1	0	0	1	1	1	1	0	0	1	1	1	0	0	0
MA013130229	GS	0	0	0	0	1	0	1	1	0	1	1	0	0	0	0	0
MA013130230	SOR	0	1	0	0	1	1	1	1	0	1	1	0	1	0	0	0
MA013130231	GS	0	1	1	0	1	0	1	1	0	0	1	0	1	0	0	0
MA013130232	SOR	0	0	1	0	1	1	1	1	0	0	1	0	0	0	0	0
MA013130233	GS	0	0	0	0	0	0	1	1	1	0	1	0	0	0	0	0
MA013130234	SOR	1	0	0	0	1	0	1	1	1	1	1	0	1	0	0	0
MA013130235	GS	1	0	1	0	1	0	1	1	0	0	1	0	0	0	0	0
MA013130236	SOR	1	0	0	0	1	0	1	1	1	0	1	0	1	0	0	0
MA013130237	GS	0	0	1	0	0	0	1	1	1	1	1	0	0	0	0	0
MA013130238	SOR	0	0	0	0	1	0	1	1	0	0	1	1	1	1	0	back pain
MA013130239	GS	0	0	1	1	1	0	1	1	0	0	1	0	0	0	0	0
MA013130240	SOR	0	1	0	1	1	1	1	1	0	0	1	1	1	0	0	0
MA013130241	GS	0	0	1	1	1	0	1	1	0	0	1	0	0	0	0	0
MA013130242	SOR	1	1	1	0	1	0	1	1	0	0	1	1	1	0	0	0
MA013130243	GS	0	0	0	0	1	0	1	1	0	1	1	0	0	0	0	0
MA013130244	SOR	0	0	0	0	1	0	1	0	0	0	1	0	0	0	0	0
MA013130245	GS	0	0	0	0	0	0	1	1	1	0	1	0	0	0	0	0
MA013130246	SOR	1	0	1	1	1	1	1	1	1	0	1	0	1	0	1	joint pain
MA013130247	GS	1	1	0	1	1	0	1	1	0	1	1	0	0	0	0	0
MA013130248	SOR	1	0	0	0	1	1	1	1	1	1	1	1	1	0	0	joint pain
MA013130249	GS	1	0	1	1	0	0	1	1	0	0	0	1	0	1	0	0
MA013130250	SOR	0	0	1	1	1	0	0	1	1	0	1	0	0	0	0	joint pain
MA013130252	SOR	0	1	1	1	1	0	1	1	0	0	1	0	1	0	0	0
MA013130253	GS	0	0	0	1	1	0	1	1	1	1	1	0	1	0	0	0
MA013130254	SOR	1	0	1	1	1	1	1	1	1	1	1	0	1	0	0	0
MA013130255	GS	0	0	1	1	1	0	1	1	1	1	1	1	1	0	0	0
MA013130256	SOR	1	0	0	1	1	1	1	1	0	0	1	0	0	0	0	0
MA013130257	GS	0	1	0	1	1	1	1	1	1	1	1	0	0	0	0	0
MA013130258	SOR	1	1	1	1	1	1	1	1	0	1	1	0	1	0	1	0
MA013130259	GS	1	0	1	1	1	0	1	1	0	1	1	0	0	0	0	0
MA013130260	SOR	1	1	1	1	1	1	1	1	0	1	1	0	1	0	1	joint pain
MA013130261	GS	0	0	0	0	1	0	1	1	0	0	1	0	0	0	0	0
MA013130262	SOR	1	1	1	1	1	1	1	1	0	0	1	0	0	1	0	0
MA013130264	SOR	0	0	0	1	1	0	1	1	0	0	1	0	1	0	0	0
MA013130265	GS	0	0	0	0	1	0	1	1	0	0	1	0	0	0	0	0
MA013130266	SOR	0	0	0	1	1	0	0	1	1	0	1	0	1	0	0	0
MA013130267	GS	0	0	1	1	1	0	1	1	0	0	1	0	1	0	0	0
MA013130268	SOR	0	0	1	1	1	0	1	1	0	1	1	0	0	0	0	joint pain
MA013130269	GS	0	0	0	0	1	0	1	1	0	1	1	0	1	0	0	0
MA013130270	SOR	1	1	1	1	1	1	1	1	0	1	1	1	1	1	0	joint pain
MA013130271	GS	0	0	1	0	1	1	1	1	0	0	1	1	1	0	0	0
MA013130272	SOR	1	1	1	1	1	1	1	1	0	1	1	0	1	0	0	0
MA013130273	GS	0	0	0	0	1	0	1	1	0	1	1	0	1	0	0	0
MA013130274	SOR	0	1	1	1	1	0	1	1	1	0	1	1	0	0	0	sore throat + joint pain
MA013130275	GS	0	0	1	0	1	0	1	1	0	0	1	0	0	0	0	0
MA013130276	SOR	1	0	1	1	1	1	1	1	1	0	1	0	0	0	0	joint pain
MA013130277	GS	1	0	0	0	0	0	1	1	0	0	1	0	1	0	0	0
MA013130278	SOR	1	0	0	1	1	1	0	1	0	1	1	0	0	0	0	joint pain
MA013130279	GS	1	0	0	0	1	0	1	1	0	0	1	0	0	0	0	0
MA013130280	SOR	1	0	1	1	1	1	1	1	0	0	1	0	0	0	0	joint pain
MA013130281	GS	1	0	0	0	1	0	1	1	0	1	1	0	0	0	0	0
MA013130282	SOR	0	1	0	1	0	0	1	1	0	1	1	0	1	0	0	0
MA013130283	GS	1	0	1	1	1	0	1	1	0	1	1	0	0	0	0	0
MA013130284	SOR	0	0	1	1	1	0	1	1	0	1	1	1	0	0	0	0
MA013130285	GS	0	1	1	0	0	0	1	1	0	1	1	0	0	0	0	0
MA013130287	GS	1	0	0	0	1	1	1	1	0	0	0	0	0	0	0	0
MA013130288	SOR	0	1	1	1	1	0	1	1	0	0	1	0	0	0	1	0
MA013130289	GS	1	0	0	0	0	0	1	1	0	1	1	0	0	0	0	0
MA013130290	SOR	0	1	1	0	1	0	1	1	0	0	1	1	1	0	0	0
MA013130291	GS	0	0	1	0	0	0	1	1	0	1	1	0	0	0	0	0
MA013130292	SOR	0	0	0	0	1	0	1	1	1	0	1	0	0	0	0	0
MA013130293	GS	0	0	0	0	0	0	1	1	0	0	1	0	0	0	0	0
MA013130294	SOR	1	1	0	0	1	1	1	1	0	0	1	0	1	0	0	0
MA013130295	GS	0	0	1	0	1	0	1	1	0	0	1	0	0	0	0	0
MA013130296	SOR	1	0	0	0	1	0	1	1	1	0	1	1	1	0	0	0
MA013130297	GS	0	0	0	0	1	0	1	1	0	0	1	0	0	0	0	0
MA013130298	SOR	0	1	0	0	1	0	1	1	0	0	1	0	0	0	0	0
MA013130299	GS	0	0	0	0	0	0	1	1	0	0	1	0	1	0	0	0
MA013130300	SOR	1	1	0	0	1	1	1	1	0	0	1	0	1	0	0	0
MA013130301	GS	0	0	0	0	1	0	1	1	0	0	0	0	1	0	0	0
MA013130302	SOR	0	0	0	0	1	0	1	1	0	0	1	1	1	0	0	0
MA013130303	GS	0	0	0	0	1	0	1	1	1	1	1	0	0	0	0	0
MA013130304	SOR	0	1	1	0	1	1	1	1	1	0	1	1	1	0	0	0
MA013130305	GS	0	1	1	1	1	1	1	1	1	1	1	0	1	0	0	0
MA013130306	SOR	1	1	1	0	1	1	1	1	0	0	1	0	1	0	0	0
MA013130307	GS	0	1	0	0	1	0	1	1	1	0	1	0	1	0	0	0
MA013130308	SOR	1	1	0	0	1	1	1	1	0	0	1	1	1	0	0	0
MA013130309	GS	0	0	1	1	1	0	1	1	1	1	1	0	1	0	0	0
MA013130310	SOR	0	1	1	1	1	0	1	1	1	1	1	0	1	0	0	0
MA013130312	SOR	1	0	0	1	1	1	1	1	1	1	1	0	1	0	0	0
MA013130313	GS	0	0	0	0	0	1	1	1	1	1	1	0	1	0	0	0
MA013130314	SOR	1	0	0	1	1	1	1	1	1	0	1	0	1	0	0	0
MA013130315	GS	0	0	1	1	1	0	1	1	0	0	1	1	1	0	0	0
MA013130316	SOR	1	1	1	1	1	1	1	1	0	0	1	0	1	0	0	0
MA013130317	GS	0	1	0	1	1	0	1	1	0	0	1	0	0	0	0	0
MA013130318	SOR	0	0	1	1	1	0	1	1	0	0	1	0	1	0	0	0
MA013130319	GS	0	1	0	1	1	0	1	1	0	0	1	1	1	0	0	0
MA013130320	SOR	1	0	1	0	1	1	1	1	0	1	1	0	1	0	0	0
MA013130321	GS	0	0	0	0	1	1	1	1	1	1	1	0	0	0	0	0
MA013130322	SOR	0	0	0	1	0	0	0	1	0	1	1	0	0	0	0	0
MA013130324	SOR	1	1	1	1	1	1	1	1	0	1	1	0	1	0	0	0
MA013130325	GS	0	0	0	1	1	1	1	1	0	0	1	0	1	0	0	0
MA013130326	SOR	0	0	0	1	0	0	1	1	1	0	1	0	0	0	0	0
MA013130327	GS	0	0	0	0	1	0	1	1	0	0	1	0	0	0	0	0
MA013130328	SOR	0	0	0	0	0	0	1	1	0	0	1	0	0	0	0	joint pain
MA013130329	GS	0	0	0	0	1	0	1	1	0	0	1	0	0	0	0	0
MA013130330	SOR	1	1	1	1	1	1	1	1	1	1	1	1	0	0	1	joint pain
MA013130331	GS	0	0	0	1	1	0	1	1	0	1	1	0	0	0	0	0
MA013130332	SOR	1	0	1	1	1	1	1	1	0	0	1	0	0	0	0	0
MA013130333	GS	0	0	0	0	1	1	1	1	0	1	1	0	1	0	0	0
MA013130334	SOR	1	0	1	1	1	1	1	1	0	1	1	1	1	0	0	0
MA013130335	GS	0	0	0	0	0	1	1	1	1	0	1	1	0	0	0	0
MA013130336	SOR	0	0	1	1	0	0	1	1	0	1	1	0	1	0	0	0
MA013130337	GS	0	0	0	1	1	1	1	1	0	0	1	0	0	0	0	0
MA013130338	SOR	0	1	1	1	1	0	1	1	0	0	1	0	1	0	0	0
MA013130339	GS	0	0	0	0	0	0	1	1	0	0	1	0	0	0	0	0
MA013130340	SOR	1	0	1	1	1	1	1	1	0	1	0	0	0	0	0	0
MA013130341	GS	0	0	1	0	0	0	1	1	0	0	1	0	0	0	0	0
MA013130342	SOR	1	0	0	1	1	1	1	1	0	1	1	0	1	0	0	0
MA013130343	GS	0	0	0	0	1	0	1	1	0	0	1	0	0	0	0	0
MA013130344	SOR	1	0	1	1	1	1	1	1	1	1	1	0	0	0	0	joint pain
MA013130345	GS	0	0	0	0	0	0	1	1	1	0	0	0	1	0	0	0
MA013130346	SOR	0	0	0	1	1	0	1	1	0	1	1	1	1	0	1	joint pain
MA013130347	GS	0	0	0	0	0	0	1	1	0	1	0	0	0	0	0	0
MA013130348	SOR	1	0	1	1	1	1	1	1	1	0	1	0	1	0	0	joint pain
MA013130349	GS	0	0	0	0	0	0	1	1	0	0	1	0	0	0	0	0
MA013130350	SOR	0	0	1	1	1	0	1	1	1	1	1	0	1	0	0	0
MA013130351	GS	0	0	0	0	0	0	1	1	0	0	1	0	0	0	0	0
MA013130352	SOR	0	1	1	1	1	0	1	1	0	1	1	0	1	0	1	joint pain
MA013130353	GS	0	0	0	0	0	0	1	1	0	1	1	0	0	0	0	0
MA013130354	SOR	0	1	1	1	1	0	1	1	0	1	1	0	0	0	0	0
MA013130355	GS	0	0	0	0	0	0	0	1	1	0	1	0	0	0	0	0
MA013130356	SOR	0	0	1	1	1	1	1	1	1	1	1	1	1	0	0	0
MA013130357	GS	1	0	0	1	1	0	1	1	0	1	1	0	0	0	0	0
MA013130358	SOR	0	0	0	1	1	0	1	1	0	1	1	0	1	0	0	0
MA013130359	GS	0	0	0	0	1	1	1	1	0	1	1	0	0	0	0	0
MA013130360	SOR	1	0	0	1	1	1	1	1	0	1	1	0	0	0	1	0
MA013130361	GS	0	0	0	0	1	0	1	1	1	1	1	0	0	0	0	0
MA013130362	SOR	0	0	1	1	1	0	1	1	1	1	1	0	0	0	0	0
MA013130363	GS	0	0	0	0	1	0	0	0	0	0	1	1	0	0	0	0
MA013130364	SOR	0	0	1	0	1	0	1	1	0	0	1	0	0	0	0	0
MA013130365	GS	0	1	0	0	1	1	1	1	1	1	1	0	0	0	0	0
MA013130366	SOR	0	0	1	1	1	0	0	1	0	0	1	0	0	0	0	0
MA013130367	GS	0	0	0	0	1	1	1	1	0	0	1	1	1	0	0	0
MA013130368	SOR	1	0	0	1	0	1	1	1	1	0	1	0	1	0	0	joint pain
MA013130369	GS	0	0	0	0	1	0	0	1	1	0	0	0	1	0	0	0
MA013130370	SOR	0	0	1	1	1	0	1	1	0	1	1	0	1	0	0	joint pain
MA013130371	GS	0	0	0	0	0	0	0	1	0	0	1	0	0	0	0	0
MA013130372	SOR	1	1	1	1	1	1	1	1	0	1	1	0	1	0	1	joint pain + heartburn
MA013130373	GS	0	0	0	0	0	0	0	1	1	0	0	0	0	0	0	0
MA013130374	SOR	0	0	0	0	1	0	1	1	0	0	1	0	0	0	0	0
MA013130375	GS	0	0	0	0	0	0	1	1	0	0	1	0	0	0	0	0
MA013130376	SOR	1	0	0	0	0	1	0	1	0	1	0	0	1	0	0	0
MA013130377	GS	1	0	0	0	0	0	1	1	0	1	0	0	1	0	0	0
MA013130378	SOR	0	0	1	0	0	0	1	1	0	1	1	0	0	0	0	0
MA013130379	GS	0	0	0	0	0	0	0	1	1	0	0	1	0	0	0	0
MA013130380	SOR	0	0	0	0	0	0	1	1	1	0	1	0	0	0	1	0
MA013130381	GS	0	0	1	0	0	0	0	1	0	0	1	0	0	0	0	0
MA013130382	SOR	0	0	0	1	1	0	1	1	0	1	1	1	0	0	0	joint pain
MA013130383	GS	0	0	0	0	0	0	1	1	0	0	1	0	0	0	0	0
MA013130384	SOR	0	0	1	1	1	1	1	1	0	1	1	0	1	0	1	joint pain
MA013130385	GS	0	0	0	0	1	0	1	1	0	1	1	0	0	0	0	0
MA013130386	SOR	1	0	1	0	1	0	1	1	0	1	1	0	0	0	0	loin pain
MA013130387	GS	0	0	0	0	0	0	1	1	1	0	1	0	0	0	0	0
MA013130388	SOR	1	0	0	1	1	1	1	1	0	0	1	0	1	0	1	0
MA013130389	GS	0	0	0	0	1	0	0	1	0	0	0	1	1	0	0	0
MA013130390	SOR	0	1	1	1	0	0	1	1	1	1	1	0	1	0	0	0
MA013130391	GS	0	0	0	0	1	0	1	1	0	1	1	0	0	0	0	0
MA013130392	SOR	1	0	0	1	1	1	1	1	0	0	1	0	0	0	0	0
MA013130393	GS	1	0	0	0	0	0	1	1	0	0	0	0	1	0	0	0
MA013130394	SOR	0	0	1	1	1	0	0	1	0	1	1	1	1	0	0	0
MA013130395	GS	0	0	0	0	1	1	1	1	0	0	1	0	1	0	0	0
MA013130396	SOR	1	0	0	1	1	1	1	1	0	1	1	0	0	0	0	0
MA013130397	GS	1	0	0	0	1	0	1	1	1	0	1	1	1	0	0	0
MA013130398	SOR	0	1	1	1	1	0	0	1	0	1	1	0	1	0	1	joint pain
MA013130399	GS	0	0	1	1	1	1	1	1	1	1	1	0	1	0	0	0
MA013130400	SOR	0	0	0	1	1	0	1	1	1	0	1	0	0	0	0	0
MA013130401	GS	0	0	0	0	0	1	1	1	1	1	1	0	0	0	0	0
MA013130402	SOR	0	0	0	0	1	1	1	1	0	1	1	1	0	0	1	joint pain
MA013130403	GS	1	1	1	0	1	0	1	1	0	0	0	1	1	0	0	0
MA013130404	SOR	0	0	0	0	0	0	1	1	1	0	1	0	0	0	1	0
MA013130405	GS	0	0	0	1	1	0	1	1	1	1	1	1	1	0	0	0
MA013130406	SOR	0	0	1	0	1	0	1	1	0	0	1	1	0	0	0	0
MA013130407	GS	1	0	1	1	1	1	1	1	1	1	1	1	1	0	0	0
MA013130408	SOR	0	0	0	0	1	0	0	1	0	0	1	0	1	0	0	0
MA013130409	GS	0	0	0	1	0	0	1	1	1	1	1	0	0	0	0	0
MA013130410	SOR	0	0	1	1	1	1	1	1	0	0	1	1	0	0	1	0
MA013130411	GS	0	1	1	1	1	0	1	1	1	1	1	0	0	0	0	0
MA013130412	SOR	1	1	1	1	1	1	1	1	0	0	1	1	1	0	0	0
MA013130413	GS	0	0	0	0	0	0	1	1	1	0	0	0	0	0	0	0
MA013130414	SOR	0	0	0	1	1	1	1	1	0	0	0	1	1	0	0	0
MA013130415	GS	1	0	0	0	0	0	1	1	0	0	1	0	0	0	0	0
MA013130416	SOR	1	0	0	0	1	1	1	1	0	1	1	0	1	0	0	0
MA013130417	GS	0	0	0	0	0	0	0	1	1	0	0	0	0	0	0	0
MA013130418	SOR	0	1	0	0	1	1	1	1	1	0	1	0	1	0	0	0
MA013130419	GS	1	0	1	0	0	0	1	1	0	0	1	0	0	0	0	0
MA013130420	SOR	0	0	0	0	1	1	1	1	1	1	1	0	0	0	0	0
MA013130421	GS	0	0	0	0	0	0	1	1	0	0	1	0	0	0	0	0
MA013130422	SOR	1	0	0	0	1	1	1	1	0	1	1	1	1	0	0	0
MA013130423	GS	1	0	0	0	0	0	1	1	0	0	0	0	0	0	0	0
MA013130424	SOR	0	1	0	0	1	1	1	1	0	0	1	1	1	0	0	back pain
MA013130425	GS	0	0	0	0	0	0	1	1	0	0	1	0	0	0	0	0
MA013130427	GS	0	0	0	0	1	0	1	1	0	0	0	0	1	0	0	0
MA013130428	SOR	1	0	1	0	1	1	1	1	0	0	1	1	1	0	0	0
MA013130429	GS	0	0	1	0	0	0	0	1	0	0	1	0	1	0	0	0
MA013130430	SOR	1	0	0	0	0	1	1	1	0	0	1	1	1	0	0	0
MA013130431	GS	0	0	0	0	1	0	0	1	1	0	0	0	1	0	0	0
MA013130432	SOR	0	0	0	0	0	0	1	1	1	0	1	0	1	0	0	0
MA013130433	GS	0	0	0	0	1	0	1	1	0	0	1	0	0	0	0	0
MA013130434	SOR	0	0	1	0	1	0	1	1	0	1	1	0	0	0	0	0
MA013130435	GS	0	0	0	0	1	0	0	1	1	0	1	0	0	0	0	0
MA013130436	SOR	0	0	0	0	1	0	0	1	0	0	1	1	0	0	0	0
MA013130437	GS	0	0	0	0	0	0	1	1	0	0	0	1	0	0	0	0
MA013130438	SOR	1	0	1	1	1	1	1	1	0	0	1	1	0	0	0	0
MA013130439	GS	0	1	1	1	1	0	1	1	0	0	1	0	0	0	0	0
MA013130440	SOR	1	0	0	1	1	1	1	1	0	0	1	1	1	0	0	joint pain
MA013130441	GS	0	0	0	0	1	0	1	1	0	0	1	0	0	0	0	0
MA013130442	SOR	0	0	1	1	0	0	1	1	0	0	1	0	1	0	0	0
MA013130443	GS	0	0	0	0	0	0	1	1	0	0	1	0	0	0	0	0
MA013130444	SOR	0	1	1	1	0	0	1	1	0	0	1	0	1	0	0	0
MA013130445	GS	0	1	0	1	0	0	1	1	0	0	1	0	0	0	0	0
MA013130446	SOR	1	0	1	1	1	1	1	1	1	1	1	1	1	0	0	joint pain
MA013130447	GS	0	0	0	0	1	0	1	1	0	0	1	0	0	0	0	0
MA013130448	SOR	0	0	1	1	1	0	0	1	0	1	1	1	0	0	0	0
MA013130449	GS	0	1	1	1	1	1	1	1	0	1	1	0	1	0	0	0
MA013130450	SOR	1	0	0	0	1	1	1	1	0	0	1	1	0	0	0	0
MA013130451	GS	1	0	1	0	0	0	1	1	1	1	1	0	0	0	0	0
MA013130453	GS	0	0	0	0	1	1	1	1	0	0	0	0	0	0	0	0
MA013130454	SOR	1	0	0	0	0	1	1	1	1	0	1	0	0	0	0	0
MA013130455	GS	0	0	0	0	0	1	1	1	1	1	1	0	0	0	0	0
MA013130456	SOR	1	0	0	0	0	0	1	1	0	1	1	0	0	0	0	loin pain
MA013130457	GS	1	0	0	0	1	1	1	1	1	1	1	0	0	0	0	0
MA013130458	SOR	0	0	0	0	0	0	1	1	0	0	1	0	0	0	1	0
MA013130459	GS	0	0	0	0	1	1	1	1	1	1	1	1	1	0	0	0
MA013130460	SOR	0	0	0	0	0	0	1	1	0	0	1	0	0	0	0	0
MA013130461	GS	0	0	0	1	1	1	1	1	1	1	1	0	0	0	0	0
MA013130462	SOR	1	0	1	1	1	0	1	1	1	1	1	0	0	0	0	loin pain + pubic pain
MA013130463	GS	0	0	0	0	0	1	1	1	0	0	0	0	0	0	0	0
MA013130464	SOR	0	0	0	0	1	0	1	1	0	0	1	1	0	0	0	0
MA013130465	GS	0	0	0	0	1	0	0	1	0	0	0	0	0	0	0	0
MA013130466	SOR	1	1	1	1	1	1	1	1	0	1	1	1	1	0	1	loin pain + epigastric pain
MA013130467	GS	1	1	0	1	1	1	1	1	0	1	1	0	0	0	0	0
MA013130468	SOR	0	0	0	0	1	1	1	1	0	0	1	0	1	0	0	0
MA013130469	GS	0	0	0	0	1	0	1	1	0	0	1	0	0	0	0	0
MA013130470	SOR	1	0	0	0	0	0	1	1	0	1	1	0	0	0	0	0
MA013130471	GS	0	0	0	0	1	0	1	1	0	0	1	0	0	0	0	0
MA013130472	SOR	1	1	1	1	0	0	0	1	0	1	1	0	1	0	0	0
MA013130473	GS	0	0	0	0	1	0	1	1	1	1	1	1	1	0	0	0
MA013130474	SOR	1	0	0	0	1	1	1	1	0	0	0	1	0	0	0	0
MA013130475	GS	0	0	0	0	1	1	1	1	1	1	1	0	0	0	0	0
MA013130476	SOR	0	0	1	0	0	0	1	1	0	1	0	0	0	0	0	0
MA013130477	GS	0	1	1	1	1	1	1	1	0	1	1	0	1	0	0	0
MA013130478	SOR	0	0	1	1	1	0	1	1	0	0	1	0	1	0	0	0
MA013130479	GS	0	0	0	0	1	1	1	1	0	0	1	0	0	0	0	0
MA013130480	SOR	1	1	1	1	0	0	0	1	1	1	1	1	0	0	1	0
MA013130481	GS	0	0	0	0	1	0	1	1	0	0	0	0	0	0	0	0
MA013130482	SOR	0	0	0	1	1	0	1	1	0	0	1	0	0	0	0	joint pain
MA013130483	GS	0	0	0	0	1	1	1	1	0	1	1	0	1	0	0	0
MA013130484	SOR	1	1	1	0	0	1	1	1	1	1	1	1	1	0	0	joint pain
MA013130485	GS	0	0	0	0	1	1	1	1	0	0	1	0	0	0	0	0
MA013130486	SOR	1	0	0	1	1	1	1	1	1	0	1	0	1	0	0	0
MA013130487	GS	0	0	0	0	1	1	1	1	0	0	1	0	0	0	0	0
MA013130488	SOR	0	0	1	1	0	0	1	1	0	0	1	0	1	0	0	joint pain
MA013130489	GS	0	0	0	0	1	0	1	1	0	0	0	1	0	0	0	0
MA013130490	SOR	1	1	0	0	1	0	1	1	0	0	1	1	1	0	0	0
MA013130491	GS	0	0	0	0	1	1	1	1	1	1	1	0	0	0	0	0
MA013130492	SOR	1	1	0	1	1	0	1	1	0	0	1	0	0	0	0	0
MA013130493	GS	0	1	1	1	1	1	1	1	1	1	1	0	0	0	0	0
MA013130494	SOR	0	1	0	0	1	0	1	1	1	0	1	0	0	0	0	0
MA013130495	GS	0	0	1	1	1	1	1	1	0	0	1	1	0	0	0	0
MA013130496	SOR	0	1	0	0	1	1	1	1	0	0	1	0	1	0	0	0
MA013130497	GS	0	0	1	0	1	1	1	1	1	1	1	0	0	0	0	0
MA013130498	SOR	0	0	0	0	1	0	1	1	1	0	1	0	0	0	0	joint pain
MA013130499	GS	0	0	0	1	1	1	1	1	0	0	1	0	0	0	0	0
MA013130500	SOR	1	1	0	0	1	0	1	1	0	0	1	0	1	0	0	0
MA013130501	GS	0	0	0	0	1	1	1	1	0	0	1	0	0	0	0	0
MA013130502	SOR	0	0	0	0	1	0	1	1	0	0	1	1	1	0	0	0
MA013130503	GS	0	0	0	1	1	1	1	1	0	0	1	0	0	0	0	0
MA013130504	SOR	1	0	0	0	1	1	1	1	0	1	1	1	1	0	0	0
MA013130505	GS	0	0	0	0	1	0	1	1	0	0	1	0	0	0	0	0
MA013130506	SOR	1	1	0	0	1	0	1	1	1	1	1	1	1	0	0	0
MA013130507	GS	0	1	0	0	1	0	0	0	1	1	1	0	0	0	0	0
MA013130508	SOR	0	1	1	1	1	0	1	1	0	0	1	0	0	0	0	0
MA013130509	GS	0	0	0	0	1	0	1	1	0	0	1	0	0	0	0	0
MA013130511	GS	0	0	0	0	0	0	1	1	1	0	1	0	0	0	0	0
MA013130513	GS	0	0	0	0	0	0	1	1	1	0	1	0	1	0	0	0
MA013130515	GS	0	0	0	1	1	0	1	1	0	1	1	0	0	0	0	0
MA013130517	GS	0	0	0	0	0	0	1	1	0	0	1	0	0	0	0	0
MA013130518	SOR	0	1	1	1	1	0	1	1	0	0	0	0	0	0	0	0
MA013130519	GS	0	0	0	0	0	0	1	1	0	1	1	0	0	0	0	0
MA013130520	SOR	0	1	1	1	1	0	1	1	0	0	1	0	1	0	0	0
MA013130521	GS	0	0	0	0	0	0	1	1	0	0	1	0	0	0	0	0
MA013130522	SOR	0	0	0	0	1	1	1	1	0	1	1	0	0	0	0	0
MA013130523	GS	0	0	0	0	0	0	1	1	0	0	1	0	1	0	0	0
MA013130524	SOR	1	1	0	1	1	0	1	1	0	1	1	0	0	0	0	joint pain
MA013130525	GS	0	0	0	0	1	0	1	1	0	1	0	0	0	0	0	0
MA013130526	SOR	0	1	0	1	1	1	1	1	0	0	1	0	0	0	0	0
MA013130527	GS	0	0	0	0	0	0	1	1	1	0	1	0	0	0	0	0
MA013130528	SOR	1	1	0	0	1	0	1	1	0	0	1	0	1	0	0	0
MA013130529	GS	1	0	1	0	0	0	1	1	0	0	1	0	0	0	0	0
MA013130530	SOR	1	1	0	1	1	0	1	1	0	0	1	1	1	0	0	joint pain + loin pain
MA013130531	GS	0	1	0	0	0	0	1	1	0	0	1	0	0	0	0	0
MA013130532	SOR	0	0	0	1	1	0	1	1	0	0	1	1	1	0	0	0
MA013130533	GS	0	1	0	0	0	1	1	1	0	0	1	0	0	0	0	0
MA013130535	GS	0	0	0	0	0	0	1	1	1	0	1	0	0	0	0	0
MA013130536	SOR	0	0	0	1	1	1	1	1	1	0	1	1	1	0	0	0
MA013130537	GS	0	0	0	0	0	0	1	1	0	1	1	0	0	0	0	0
MA013130538	SOR	0	0	0	1	0	0	0	1	0	1	1	0	0	0	1	joint pain
MA013130539	GS	0	0	0	0	0	0	1	1	0	1	1	0	1	0	0	0
MA013130540	SOR	0	0	1	0	1	0	0	1	0	0	1	1	1	0	0	0
MA013130541	GS	0	0	0	0	1	1	1	1	0	0	1	0	0	0	0	0
MA013130542	SOR	0	0	0	0	1	0	0	1	1	0	1	0	0	0	1	sore throat
MA013130543	GS	0	0	0	0	0	1	1	1	0	0	1	0	0	0	0	0
MA013130544	SOR	1	0	0	1	1	1	1	1	0	0	1	0	1	0	0	joint pain
MA013130545	GS	0	0	0	0	1	1	1	1	0	0	1	0	0	0	0	0
MA013130546	SOR	0	0	0	0	1	0	1	1	0	0	1	1	0	0	0	0
MA013130547	GS	1	0	0	0	1	1	0	0	1	1	0	0	0	0	0	0
MA013130548	SOR	1	0	0	0	1	1	1	1	0	1	1	1	1	0	0	0
MA013130549	GS	1	0	0	0	1	1	1	1	1	1	1	0	0	0	0	0
MA013130550	SOR	0	0	1	0	0	0	1	1	0	1	1	0	1	0	0	0
MA013130551	GS	1	1	1	1	1	1	1	1	0	0	1	0	0	0	0	0
MA013130552	SOR	0	0	1	1	1	0	1	1	0	1	1	1	0	0	0	0
MA013130554	SOR	0	0	1	1	1	1	1	1	1	1	1	1	1	0	0	joint pain
MA013130556	SOR	0	0	1	1	1	1	1	1	0	1	1	1	1	0	1	joint pain
MA013130558	SOR	0	0	1	0	0	0	0	1	1	0	1	0	0	0	0	0
MA013130562	SOR	1	0	0	0	0	1	0	1	0	0	0	1	1	0	0	0
MA013130564	SOR	0	0	1	1	0	0	1	1	0	1	1	0	0	0	0	0
MA013130568	SOR	0	0	0	0	1	0	1	1	0	1	1	0	0	0	0	loin pain
MA013130570	SOR	0	0	1	1	1	0	0	1	0	0	1	1	1	0	0	0
MA013130572	SOR	1	1	1	1	1	1	1	1	0	1	1	0	1	0	0	loin pain
MA013130574	SOR	1	0	0	0	1	1	1	1	0	0	0	1	0	0	0	0
MA013130576	SOR	0	1	1	1	1	0	0	1	0	0	1	0	0	0	0	0
MA013130578	SOR	0	1	0	0	1	0	1	1	0	0	1	0	0	0	0	0
MA013130580	SOR	1	1	1	0	1	0	1	1	0	0	1	0	1	0	0	0
MA013130582	SOR	1	1	0	0	1	0	1	1	1	0	1	0	1	0	0	0
MA013130584	SOR	0	0	0	1	1	1	1	1	0	1	1	0	0	0	0	0
MA013130586	SOR	0	0	0	0	1	0	1	1	1	0	1	0	0	0	0	0
MA013130588	SOR	1	1	0	0	1	0	1	1	0	0	1	0	0	0	0	0
MA013130590	SOR	1	1	0	1	1	1	1	1	0	0	1	1	1	0	0	0
MA013130592	SOR	0	0	0	0	1	0	1	1	0	0	1	0	0	0	0	joint pain
MA013130594	SOR	0	1	0	1	1	0	1	1	1	0	1	0	0	0	0	0
MA013130598	SOR	0	1	0	0	1	1	1	1	1	0	1	1	1	0	0	0
MA013130600	SOR	1	1	0	1	1	0	1	1	0	0	1	0	1	0	0	back pain
MA013130602	SOR	1	1	0	1	1	0	1	1	1	0	1	0	1	0	0	0
MA013130604	SOR	1	1	0	0	1	1	1	1	0	0	1	0	1	0	0	0
MA013130606	SOR	1	1	0	1	1	1	1	1	0	0	1	1	1	0	0	0
MA013130608	SOR	0	0	0	0	1	0	1	1	0	0	1	0	0	0	0	0
MA013130610	SOR	0	1	0	0	0	0	1	1	0	0	1	0	0	0	0	0
MA013130612	SOR	1	0	1	0	0	0	1	1	0	1	1	0	0	0	0	0
MA013130614	SOR	0	0	0	0	1	0	1	1	0	0	1	0	1	0	0	0
MA013130616	SOR	1	1	0	0	1	0	1	1	0	0	1	1	1	0	0	0
MA013130618	SOR	0	0	0	0	1	0	1	1	1	0	0	0	0	0	0	0
MA013130620	SOR	0	1	0	1	1	0	1	1	1	0	1	0	0	0	0	0
MA013130622	SOR	0	0	0	0	1	0	1	1	1	0	1	0	0	1	0	0
MA013130624	SOR	1	1	0	0	1	0	0	1	0	0	1	0	0	0	0	0
MA013130626	SOR	1	1	0	0	1	1	1	1	0	0	1	0	1	0	0	0
MA013130628	SOR	1	1	0	1	1	0	1	1	0	0	1	0	1	0	0	0
MA013130630	SOR	1	1	0	0	1	0	1	1	1	0	1	1	1	0	0	0
MA013130632	SOR	1	1	0	0	1	0	1	1	0	0	1	0	1	0	0	0
MA013130634	SOR	0	0	0	0	1	1	1	1	1	0	1	1	1	0	0	0
MA013130636	SOR	0	1	0	0	1	1	1	1	0	0	1	0	0	0	0	0
MA013130638	SOR	1	0	0	1	1	1	1	1	0	0	1	0	1	0	1	joint pain
MA013130640	SOR	0	0	1	0	0	0	1	1	0	0	1	0	0	0	0	0
MA013130642	SOR	0	0	1	1	1	0	1	1	1	1	1	0	1	1	0	joint pain + sore throat
MA013130644	SOR	0	0	0	0	0	0	0	1	0	0	1	0	0	0	0	0
MA013130646	SOR	0	0	0	0	1	0	0	1	0	0	0	1	1	0	0	0
MA013130648	SOR	1	0	0	0	1	1	1	1	0	0	1	0	1	0	0	0
MA013130650	SOR	0	0	0	0	0	0	1	1	0	1	0	0	0	0	0	0
MA013130656	SOR	0	0	0	1	0	0	1	1	0	0	1	0	1	0	1	0
MA013130658	SOR	1	0	0	0	1	1	1	1	0	0	0	1	0	0	0	0
MA013130660	SOR	1	0	1	0	1	1	1	0	0	0	1	1	1	0	0	0
MA013130662	SOR	0	1	0	1	1	0	0	1	0	0	1	0	0	0	1	joint pain
MA013130664	SOR	0	0	0	0	0	0	0	1	1	0	1	0	0	0	0	0
MA013130666	SOR	1	0	0	0	1	0	1	1	0	1	1	0	0	0	0	0
MA013130668	SOR	0	0	1	1	1	0	0	1	0	1	1	0	1	0	1	joint pain
MA013130670	SOR	1	0	0	0	1	0	1	1	1	1	1	1	0	0	0	0
MA013130672	SOR	0	0	1	0	1	0	1	1	1	0	1	0	0	0	1	0
MA013130674	SOR	0	0	0	0	0	0	0	1	0	0	1	0	0	0	1	0
MA013130676	SOR	1	0	0	0	0	1	0	1	0	0	0	0	1	0	0	heartburn
MA013130678	SOR	0	0	1	0	0	0	1	1	1	0	1	0	0	0	1	sore throat
MA013130680	SOR	1	0	0	0	1	1	1	0	0	1	1	1	1	0	0	0
MA013130682	SOR	0	0	0	0	0	0	1	1	0	0	1	0	0	1	1	0
MA013130684	SOR	1	0	0	0	0	1	0	0	0	0	0	1	1	0	0	0
MA013130686	SOR	1	0	0	0	0	1	0	1	0	0	0	0	0	0	0	0
MA013130688	SOR	0	0	0	0	1	1	1	1	0	1	1	0	1	0	0	0
MA013130690	SOR	0	1	1	0	0	0	1	1	0	0	1	0	0	0	0	0
MA013130692	SOR	1	0	1	1	1	1	1	1	0	1	1	1	1	0	1	joint pain
MA013130694	SOR	0	0	1	1	1	0	1	1	0	1	1	1	0	0	0	0
MA013130696	SOR	0	0	1	0	0	0	1	1	1	0	0	0	1	0	0	0
MA013130698	SOR	0	1	0	1	1	0	1	1	0	0	1	0	0	0	0	back pain
MA013130700	SOR	1	0	0	0	1	1	1	1	0	0	1	0	1	0	0	0
MA013130702	SOR	0	0	0	0	1	0	1	1	1	0	1	0	0	0	0	0
MA013130704	SOR	0	1	0	0	1	0	1	1	0	0	1	0	1	0	0	0
MA013130706	SOR	1	0	0	0	1	0	1	1	0	0	1	1	1	0	0	0
MA013130708	SOR	0	0	0	0	1	0	1	1	1	0	1	0	0	0	0	joint pain
MA013130710	SOR	1	1	0	0	1	0	1	1	0	0	1	1	1	0	0	0
MA013130712	SOR	0	0	0	0	1	1	0	1	0	0	1	1	1	0	0	0
MA013130714	SOR	0	1	0	0	1	0	1	1	0	0	0	0	0	0	0	0
MA013130716	SOR	0	1	0	0	1	0	1	1	1	0	1	0	0	0	0	0
MA013130718	SOR	0	1	0	1	1	0	1	1	0	0	1	0	0	0	0	0
MA013130720	SOR	0	0	1	1	1	0	1	1	0	0	1	0	0	0	0	0
MA013130722	SOR	1	1	0	0	1	0	1	1	0	0	1	0	0	0	0	0
MA013130724	SOR	1	0	0	0	0	1	1	1	0	0	1	0	0	0	0	joint pain
MA013130726	SOR	0	0	1	1	1	1	0	1	1	0	1	0	0	0	0	0
MA013130728	SOR	1	1	0	0	1	0	1	1	0	0	1	0	0	0	0	back pain
MA013130730	SOR	0	0	0	0	1	0	1	1	1	0	1	0	0	0	0	0
MA013130732	SOR	0	1	0	0	1	0	1	1	0	0	1	0	1	0	0	0
MA013130734	SOR	1	1	0	0	1	1	1	1	1	0	1	0	1	0	0	0
MA013130736	SOR	1	1	0	0	1	1	1	1	1	0	1	1	1	0	0	0
MA013130738	SOR	0	0	1	0	0	0	1	1	0	0	0	0	1	0	0	0
MA013130740	SOR	1	0	0	0	0	1	0	1	0	0	1	1	0	0	0	0
MA013130742	SOR	0	0	1	1	1	0	1	1	0	0	1	0	0	0	0	joint pain
MA013130744	SOR	0	0	1	1	0	0	0	1	0	1	1	0	1	0	0	0
MA013130746	SOR	1	1	1	1	1	1	1	1	0	1	1	0	1	0	0	0
MA013130748	SOR	0	1	0	1	1	0	1	1	0	0	1	0	0	0	0	0
MA013130750	SOR	1	0	0	0	1	1	0	1	0	0	1	0	1	0	0	0
MA013130752	SOR	0	0	0	0	1	0	1	1	1	0	1	0	0	0	0	0
MA013130756	SOR	1	1	1	1	1	1	1	1	0	0	1	1	0	0	0	0
MA013130758	SOR	1	0	0	1	1	1	0	1	0	0	1	0	1	0	0	0
MA013130760	SOR	0	0	0	1	1	0	1	1	0	1	1	1	1	0	1	joint pain
MA013130762	SOR	0	0	0	0	0	0	0	1	0	1	1	1	0	0	0	0
MA013130764	SOR	1	0	0	0	1	1	1	1	0	0	1	1	0	0	0	0
MA013130766	SOR	1	0	0	0	1	0	1	1	0	1	1	0	0	0	0	0
MA013130768	SOR	0	0	1	0	0	0	1	1	1	0	1	0	1	0	1	sore throat
MA013130770	SOR	0	1	1	1	1	0	0	1	0	1	1	0	0	0	0	0
MA013130772	SOR	1	0	0	0	0	0	0	1	1	1	1	0	0	0	0	0
MA013130774	SOR	1	1	1	1	1	1	1	1	0	1	1	1	1	0	0	joint pain
MA013130776	SOR	0	1	0	0	1	1	1	1	1	0	1	0	0	0	0	0
MA013130778	SOR	1	1	0	0	1	0	1	1	0	0	1	0	0	0	0	joint pain
MA013130780	SOR	1	1	0	0	1	0	1	1	0	0	1	1	1	0	0	0
MA013130782	SOR	0	1	0	0	1	0	1	1	0	0	1	0	0	0	0	0
MA013130784	SOR	1	1	0	0	1	0	1	1	0	0	1	0	0	0	0	0
MA013130786	SOR	0	1	0	0	1	0	1	1	1	0	1	0	1	0	0	0
MA013130788	SOR	0	1	0	0	1	0	1	1	0	0	1	0	0	0	0	0
MA013130790	SOR	0	1	0	0	1	0	1	1	1	0	1	0	0	0	0	0
MA013130792	SOR	1	1	0	0	1	1	1	1	0	0	1	1	1	0	0	0
MA013130794	SOR	1	1	0	0	1	0	1	1	0	0	1	0	0	0	0	0
MA013130796	SOR	1	0	0	0	1	1	1	1	0	1	1	1	1	0	0	0
MA013130798	SOR	1	0	0	1	1	1	0	1	0	1	1	0	1	0	0	0
MA013130800	SOR	0	0	0	0	1	0	1	1	0	0	1	1	0	0	0	0
MA013130802	SOR	0	0	0	0	0	0	1	1	1	0	1	0	0	0	1	0
MA013130804	SOR	1	0	0	0	1	0	1	1	0	0	1	1	1	0	1	0
MA013130806	SOR	1	1	0	1	1	0	1	1	0	0	1	0	1	0	0	0
MA013130808	SOR	0	1	0	0	1	0	1	1	0	0	1	0	0	0	0	0
MA013130810	SOR	0	0	0	0	1	1	1	1	0	0	1	0	0	0	0	0
MA013130812	SOR	1	1	0	0	1	0	1	1	0	0	1	1	1	0	0	0
MA0131308014	SOR	0	0	0	0	1	0	1	1	1	1	1	0	0	0	0	0
MA013130816	SOR	1	1	0	0	1	0	1	1	0	0	1	1	0	0	0	0
MA013130818	SOR	0	0	0	0	0	1	1	1	0	0	1	0	1	0	0	back pain
MA013130820	SOR	0	1	1	0	1	1	1	1	0	0	1	0	0	0	0	joint pain
MA013130822	SOR	0	1	0	0	1	0	1	1	0	0	1	0	0	0	0	0
MA013130824	SOR	1	1	1	1	1	0	1	1	1	0	1	0	0	0	0	0
MA013130826	SOR	0	1	0	0	1	1	1	1	1	0	0	0	1	0	0	0
MA013130828	SOR	1	0	0	0	1	1	1	1	0	0	1	0	1	0	0	0
MA013130830	SOR	0	0	0	0	1	0	1	1	1	0	1	0	0	0	0	0
MA013130832	SOR	0	0	1	0	0	0	1	1	1	0	1	0	1	0	1	sore throat
MA013130834	SOR	0	1	0	0	1	1	1	1	0	1	1	1	1	0	0	0
MA013130836	SOR	0	1	1	1	1	0	1	1	0	0	1	0	1	0	1	joint pain
MA013130838	SOR	0	1	0	0	1	0	1	1	0	0	1	0	0	0	0	0
MA013130840	SOR	1	1	0	0	1	0	1	1	0	0	1	1	1	0	0	0
MA013130842	SOR	0	1	0	1	1	0	1	1	0	0	1	0	1	0	0	0
MA013130844	SOR	1	0	0	0	1	1	1	1	0	0	1	0	0	0	0	0
MA013130846	SOR	0	0	1	1	1	0	1	1	0	0	1	0	0	0	0	0
MA013130848	SOR	1	0	0	0	1	0	1	1	1	0	1	1	1	0	0	0
MA013130850	SOR	1	0	0	0	1	1	1	1	0	1	1	0	1	0	0	back pain
MA013130852	SOR	1	0	0	0	1	1	1	1	1	1	1	1	1	0	0	0
MA013130854	SOR	0	0	0	1	1	0	1	1	0	0	1	0	0	0	1	0
MA013130856	SOR	1	0	1	1	1	1	1	1	1	0	1	1	1	0	1	joint pain
MA013130858	SOR	1	0	0	0	1	1	1	1	0	1	1	0	0	0	0	0
MA013130860	SOR	0	0	1	1	0	0	0	1	0	0	1	0	1	0	1	0
MA013130862	SOR	1	0	0	0	1	0	1	1	0	1	1	1	1	0	0	0
MA013130864	SOR	1	1	0	0	1	1	1	1	0	0	1	0	0	0	1	joint pain
