# Supplementary material for: Clinical evaluation of lateral flow Mologic malaria P.f Ag (LDH) Rapid Diagnostic Test diagnostic accuracy: A cross-sectional study, Sudan 2020-2021
Source: Research Square preprint supplement (doi:10.21203/rs.3.rs-7124055/v1), 2025-07-29
Supplement: Supplementary file 2 [file b54a8ea4b3b05713e54bc24a.docx]

**Table 2: Summary of the comparison of Mologic P*f* Ag RDT, SD Bioline P*f* RDT, and expert microscopy using PCR as reference method.**

|  | **PCR** | | | | | | | | |
| --- | --- | --- | --- | --- | --- | --- | --- | --- | --- |
|  |
|  | Outcome | Positive | Negative | Sensitivity% | Specificity% | Accuracy% | PPV% | NPV % | p-value (Weighted kappa(κ)) |
|  | (95% CI) | (95% CI) | (95% CI) | (95% CI) | (95% CI) |
| **Mologic RDT** | Positive | 193 | 0 |  |  |  |  |  |  |
|  | 91.9 | 100 | 96.2 | 100 | 93.3 | <0001 |
|  | (87.3-95.2) | (98.7-100) | (94.1-97.6) | (98.1 – 100) | (89.8-95.6) | -0.929 |
|  | Negative | 17 | 290 |  |  |  |  |  |  |
|  | Positive | 197 | 2 |  |  |  |  |  |  |
| **SD Bioline RDT** | 93.81 | 99.31 | 96.72 | 99.18 | 94.76 | <0001 |
|  | Negative | 13 | 288 | (89.6-96.6) | (97.5-99.9) | (94.7-98.1) | (96.8-99.7) | (91.4-96.8) | -0.938 |
|  | Positive | 200 | 0 |  |  |  |  |  |  |
| **Expert Microscopy** | 95.24 | 100 | 97.7 | - | 95.95 | <0001 |
|  | Negative | 10 | 290 | (91.4-97.6) | (98.7-100) | (96.0-98.8) |  | (92.8-97.7) | -0.959 |
