# Supplementary material for: Clinical evaluation of lateral flow Mologic malaria P.f Ag (LDH) Rapid Diagnostic Test diagnostic accuracy: A cross-sectional study, Sudan 2020-2021
Source: Research Square preprint supplement (doi:10.21203/rs.3.rs-7124055/v1), 2025-07-29
Supplement: Supplementary file 3 [file e01e14d3066f3adb51de1e07.xlsx]

## Sheet: PCR results_Mologic study
Participant ID	gender	age	site	temperature	RDT result (Mologic)	RDT result (SD Bioline)	Expert microscopy result	nested PCR result	parasitaemia (p/UI)
MA013130197	f	14	GS	38	0	0	0	0	0
MA013130199	f	18	GS	36.5	0	0	0	0	0
MA013130201	m	18	GS	36.6	0	0	0	0	0
MA013130204	f	65	SOR	37.6	0	0	0	0	0
MA013130206	f	55	SOR	37.8	0	0	0	0	0
MA013130208	m	22	SOR	38.1	0	0	0	0	0
MA013130210	m	37	SOR	38.1	0	0	0	0	0
MA013130214	f	32	SOR	37.6	0	0	0	0	0
MA013130216	f	54	SOR	37.2	0	0	0	0	0
MA013130218	m	43	SOR	37.2	0	0	0	0	0
MA013130220	m	46	SOR	37.2	0	0	0	0	0
MA013130223	m	33	GS	37.1	0	0	0	0	0
MA013130226	f	11	SOR	37.1	1	0	1	1	112
MA013130227	m	11	GS	37	0	0	0	0	0
MA013130230	m	27	SOR	38.2	0	0	0	0	0
MA013130232	m	29	SOR	37.6	0	0	0	0	0
MA013130233	f	40	GS	36.3	0	0	0	0	0
MA013130240	m	78	SOR	38.2	0	0	0	0	0
MA013130243	f	35	GS	36	0	0	1	1	891
MA013130245	m	18	GS	36.4	0	0	0	0	0
MA013130246	f	30	SOR	37	0	0	0	0	0
MA013130247	f	24	GS	37	0	0	0	0	0
MA013130249	f	38	GS	38.2	0	0	0	0	0
MA013130255	m	14	GS	37.1	1	0	1	1	952
MA013130258	m	29	SOR	38	0	0	0	0	0
MA013130261	f	33	GS	37.6	0	0	0	0	0
MA013130262	f	40	SOR	37.1	0	0	0	0	0
MA013130264	f	9	SOR	36.4	0	0	0	0	0
MA013130265	f	18	GS	36.5	0	0	0	0	0
MA013130266	f	11.5	SOR	36.6	0	0	0	0	0
MA013130268	f	35	SOR	37.1	0	0	0	0	0
MA013130269	m	40	GS	36.4	0	0	0	0	0
MA013130271	f	32	GS	36.5	0	0	0	0	0
MA013130272	m	65	SOR	37.8	0	0	0	0	0
MA013130273	f	25	GS	37	0	0	0	0	0
MA013130274	m	31	SOR	37.1	0	0	0	0	0
MA013130276	m	35	SOR	37.5	0	0	0	0	0
MA013130277	f	25	GS	36.8	0	0	0	0	0
MA013130278	f	25	SOR	36.9	0	0	0	0	0
MA013130279	f	21	GS	36.4	0	0	0	0	0
MA013130280	f	29	SOR	37.1	0	0	0	0	0
MA013130281	f	20	GS	36.8	0	0	0	0	0
MA013130283	f	10	GS	36.6	0	0	0	0	0
MA013130284	f	32	SOR	37.7	0	0	0	0	0
MA013130285	f	35	GS	36.5	0	0	0	0	0
MA013130287	f	30	GS	37.1	0	0	0	0	0
MA013130289	m	48	GS	36.7	0	0	0	0	0
MA013130292	m	19	SOR	38.1	0	0	0	0	0
MA013130293	m	25	GS	36.4	0	0	0	0	0
MA013130294	f	44	SOR	37.2	0	0	0	0	0
MA013130295	f	27	GS	36.9	0	0	0	0	0
MA013130302	f	38	SOR	37.7	0	0	0	0	0
MA013130303	f	19	GS	38.1	0	0	0	0	0
MA013130304	f	32	SOR	37.3	0	0	0	0	0
MA013130305	m	63	GS	37.5	0	0	0	0	0
MA013130307	m	10	GS	37.2	0	0	0	0	0
MA013130312	m	21	SOR	38.1	0	0	0	0	0
MA013130313	f	30	GS	38.3	0	0	0	0	0
MA013130314	f	8	SOR	37	0	0	0	0	0
MA013130317	m	35	GS	38.1	0	0	0	0	0
MA013130321	m	32	GS	38	0	0	0	0	0
MA013130322	f	33	SOR	36.7	0	0	0	0	0
MA013130325	m	45	GS	38.2	0	0	0	0	0
MA013130326	m	12	SOR	37.1	0	0	0	0	0
MA013130328	m	36	SOR	36.5	0	0	0	1	0
MA013130329	f	27	GS	38	0	0	0	0	0
MA013130333	f	20	GS	37.1	0	0	0	0	0
MA013130334	m	52	SOR	37.1	0	0	0	0	0
MA013130337	f	49	GS	37.2	0	0	0	0	0
MA013130338	f	29	SOR	37.5	0	0	0	0	0
MA013130340	m	18	SOR	36.8	0	0	0	0	0
MA013130341	f	40	GS	36.2	0	0	0	0	0
MA013130345	m	5	GS	36.7	0	0	0	0	0
MA013130346	m	45	SOR	38.1	0	0	0	0	0
MA013130347	f	26	GS	36.9	0	0	0	0	0
MA013130348	f	19	SOR	38.2	0	0	0	0	0
MA013130349	m	26	GS	37	0	0	0	0	0
MA013130353	f	24	GS	37	0	0	0	0	0
MA013130354	m	60	SOR	37.8	1	0	1	1	26459
MA013130355	f	5	GS	37.3	0	0	0	0	0
MA013130356	f	40	SOR	38	0	0	0	0	0
MA013130357	f	19	GS	37.6	0	0	0	0	0
MA013130359	m	45	GS	38.2	0	0	0	0	0
MA013130361	m	22	GS	37	0	0	0	0	0
MA013130362	f	32	SOR	37.8	0	0	0	0	0
MA013130363	m	24	GS	37	0	0	0	0	0
MA013130364	m	28	SOR	38	0	0	0	0	0
MA013130365	m	21	GS	38.1	0	0	0	0	0
MA013130368	m	11	SOR	37.6	0	0	0	0	0
MA013130369	m	5	GS	37.3	0	0	0	0	0
MA013130370	f	38	SOR	36.9	0	0	0	0	0
MA013130371	f	7	GS	36.4	0	0	0	0	0
MA013130374	m	25	SOR	37.3	0	0	0	0	0
MA013130376	f	30	SOR	37.8	0	0	0	0	0
MA013130378	m	23	SOR	37.9	0	0	0	0	0
MA013130379	m	10	GS	38	0	0	0	1	0
MA013130380	f	22	SOR	37.8	0	0	0	0	0
MA013130381	f	18	GS	36.3	0	0	0	0	0
MA013130383	m	30	GS	35.4	0	0	0	0	0
MA013130385	f	60	GS	36.8	0	0	0	0	0
MA013130386	f	19	SOR	37.1	0	0	0	1	0
MA013130387	f	11	GS	37	0	0	0	0	0
MA013130389	f	6	GS	36.9	0	0	0	0	0
MA013130390	m	40	SOR	37.8	1	0	1	1	512
MA013130393	f	29	GS	37.7	0	0	0	0	0
MA013130395	f	19	GS	37.6	0	0	0	0	0
MA013130397	f	21	GS	38.1	0	0	0	0	0
MA013130399	m	60	GS	37.5	0	0	0	0	0
MA013130401	f	19	GS	38.2	0	0	0	0	0
MA013130403	m	20	GS	37.3	0	0	0	0	0
MA013130404	f	24	SOR	37.8	0	0	0	0	0
MA013130406	m	27	SOR	38	0	0	1	1	80
MA013130407	f	42	GS	38.2	0	0	0	0	0
MA013130408	m	40	SOR	36.8	0	0	0	0	0
MA013130409	m	30	GS	37.7	0	0	0	0	0
MA013130411	m	32	GS	40.1	0	0	0	0	0
MA013130413	m	5	GS	36.4	0	0	0	0	0
MA013130414	m	41	SOR	38.3	0	0	0	0	0
MA013130415	m	55	GS	36.7	0	0	0	0	0
MA013130417	m	7	GS	37	0	0	0	0	0
MA013130418	m	37	SOR	36.8	0	0	0	0	0
MA013130419	f	18	GS	36.3	0	0	0	0	0
MA013130421	m	5	GS	36.7	0	0	0	0	0
MA013130422	f	28	SOR	37	0	0	0	0	0
MA013130423	m	7	GS	36.6	0	0	0	0	0
MA013130424	f	56	SOR	37.5	0	0	0	0	0
MA013130425	m	40	GS	36.1	0	0	0	0	0
MA013130427	f	19	GS	36.7	0	0	0	0	0
MA013130428	m	28	SOR	36.9	0	0	0	0	0
MA013130430	f	24	SOR	37.1	0	0	0	0	0
MA013130431	m	5	GS	36.2	0	0	0	0	0
MA013130432	f	40	SOR	37.7	0	0	0	0	0
MA013130433	m	64	GS	36.6	0	0	0	0	0
MA013130434	f	30	SOR	37.5	0	0	0	0	0
MA013130435	m	6	GS	36.9	0	0	0	0	0
MA013130437	m	5	GS	37.5	0	0	0	0	0
MA013130442	f	14	SOR	37.8	0	0	0	0	0
MA013130443	f	23	GS	36.8	0	0	0	0	0
MA013130445	m	30	GS	36.7	0	0	0	1	0
MA013130447	f	25	GS	37	0	0	0	0	0
MA013130448	m	40	SOR	37.3	0	0	0	0	0
MA013130450	m	38	SOR	36.9	0	0	0	0	0
MA013130451	f	30	GS	37.2	0	0	0	0	0
MA013130453	m	27	GS	37.1	0	0	0	0	0
MA013130454	f	30	SOR	36.9	0	0	0	0	0
MA013130455	f	32	GS	37.5	0	0	0	0	0
MA013130456	f	16	SOR	37	0	0	0	0	0
MA013130457	f	40	GS	38	0	0	0	0	0
MA013130458	f	21	SOR	37.7	0	0	0	0	0
MA013130460	f	10	SOR	37.5	0	0	0	0	0
MA013130462	f	12	SOR	37.4	0	0	0	0	0
MA013130463	m	71	GS	37	0	0	0	0	0
MA013130464	f	35	SOR	36.8	0	0	0	0	0
MA013130465	f	33	GS	37.1	0	0	0	0	0
MA013130468	f	32	SOR	37.3	0	0	0	0	0
MA013130469	m	22	GS	37	0	0	0	0	0
MA013130470	m	37	SOR	37.1	0	0	0	0	0
MA013130471	f	30	GS	37.6	0	0	0	0	0
MA013130473	f	25	GS	38.1	0	0	0	0	0
MA013130474	m	30	SOR	37.4	0	0	0	0	0
MA013130475	f	30	GS	38.3	0	0	0	0	0
MA013130479	f	20	GS	37.3	0	0	0	0	0
MA013130481	m	60	GS	38	0	0	0	0	0
MA013130483	f	41	GS	38.2	0	0	0	0	0
MA013130485	f	35	GS	37	0	0	0	0	0
MA013130487	f	23	GS	38.2	0	0	0	0	0
MA013130489	m	45	GS	37.6	0	0	0	0	0
MA013130490	m	26	SOR	37.3	0	0	0	0	0
MA013130491	f	36	GS	37.9	0	0	0	0	0
MA013130495	m	19	GS	37.5	0	0	0	0	0
MA013130497	f	42	GS	37.3	0	0	0	0	0
MA013130498	f	52	SOR	36.8	0	0	0	0	0
MA013130500	f	37	SOR	37.3	0	0	0	0	0
MA013130501	m	21	GS	37.1	0	0	0	0	0
MA013130502	m	19	SOR	36.8	0	0	0	0	0
MA013130503	m	36	GS	37.5	0	0	0	0	0
MA013130504	m	56	SOR	37.2	0	0	0	0	0
MA013130505	f	33	GS	37.6	0	0	0	0	0
MA013130506	f	38	SOR	37.5	0	0	0	0	0
MA013130507	f	21	GS	38	0	0	0	0	0
MA013130508	m	64	SOR	38.1	0	0	0	0	0
MA013130509	f	29	GS	36.9	0	0	0	0	0
MA013130511	m	8	GS	36.7	0	0	0	0	0
MA013130513	m	18	GS	36.4	0	0	0	0	0
MA013130515	m	53	GS	36.8	0	0	0	0	0
MA013130517	f	16	GS	35.9	0	0	0	0	0
MA013130518	f	29	SOR	37.5	0	0	0	0	0
MA013130519	f	80	GS	36.3	0	0	0	0	0
MA013130521	m	40	GS	37	0	0	0	0	0
MA013130522	m	52	SOR	36.9	0	0	0	0	0
MA013130523	m	34	GS	36.2	0	0	0	0	0
MA013130524	m	46	SOR	37.3	0	0	0	0	0
MA013130525	m	34	GS	36.3	0	0	0	0	0
MA013130526	f	53	SOR	37.4	0	0	0	0	0
MA013130527	m	14	GS	37	0	0	0	0	0
MA013130528	f	26	SOR	37.1	0	0	0	0	0
MA013130529	f	21	GS	37.2	0	0	0	0	0
MA013130530	f	68	SOR	38.1	0	0	0	0	0
MA013130531	f	52	GS	36.7	0	0	0	0	0
MA013130532	m	31	SOR	37.6	0	0	0	0	0
MA013130533	f	25	GS	37	0	0	0	0	0
MA013130535	f	9	GS	36.4	0	0	0	0	0
MA013130536	m	29	SOR	36.9	0	0	0	0	0
MA013130537	f	60	GS	35.8	0	0	0	0	0
MA013130539	f	18	GS	36.6	0	0	0	0	0
MA013130541	f	41	GS	37	0	0	0	0	0
MA013130542	f	30	SOR	37	0	0	0	0	0
MA013130543	f	35	GS	38	0	0	0	0	0
MA013130545	m	55	GS	39.2	0	0	0	0	0
MA013130547	m	60	GS	37	0	0	0	0	0
MA013130548	m	30	SOR	37.9	0	0	0	0	0
MA013130549	m	19	GS	37.9	0	0	0	0	0
MA013130550	m	32	SOR	36.8	0	0	0	0	0
MA013130558	m	47	SOR	37.1	0	0	0	0	0
MA013130562	f	23	SOR	36.7	0	0	0	0	0
MA013130564	m	30	SOR	37.1	0	0	0	0	0
MA013130568	m	10	SOR	37.9	0	0	0	0	0
MA013130570	m	19	SOR	36.9	0	0	0	0	0
MA013130572	f	10	SOR	38.1	0	0	0	0	0
MA013130574	f	20	SOR	36.7	0	0	0	0	0
MA013130578	m	35	SOR	37.6	0	0	0	0	0
MA013130580	f	53	SOR	37.3	0	0	0	0	0
MA013130584	f	32	SOR	37.1	0	0	0	0	0
MA013130586	f	18	SOR	37.1	0	0	0	0	0
MA013130590	f	68	SOR	37.2	0	0	0	0	0
MA013130594	f	55	SOR	37.2	0	0	0	0	0
MA013130598	f	37	SOR	37	0	0	0	0	0
MA013130600	f	58	SOR	37.2	0	0	0	0	0
MA013130604	f	56	SOR	38.1	0	0	0	0	0
MA013130606	m	65	SOR	37.3	0	0	0	0	0
MA013130608	m	37	SOR	37.2	0	0	0	0	0
MA013130610	m	42	SOR	38.1	0	0	0	0	0
MA013130612	f	37	SOR	37.8	0	0	0	0	0
MA013130614	f	32	SOR	37.5	0	0	0	0	0
MA013130616	m	44	SOR	37.9	0	0	0	0	0
MA013130618	m	37	SOR	38.2	0	0	0	0	0
MA013130620	f	29	SOR	37.2	0	0	0	0	0
MA013130622	f	18	SOR	37.5	0	0	0	0	0
MA013130624	f	21	SOR	37.1	0	0	0	0	0
MA013130626	f	45	SOR	37.7	0	0	0	0	0
MA013130632	m	36	SOR	37.1	0	0	0	0	0
MA013130634	f	67	SOR	37.5	0	0	0	0	0
MA013130636	f	36	SOR	37.2	0	0	0	0	0
MA013130640	m	19	SOR	37.5	0	0	0	0	0
MA013130646	f	40	SOR	36.9	0	0	0	0	0
MA013130648	f	60	SOR	37.7	0	0	0	0	0
MA013130650	m	40	SOR	36.8	0	0	0	0	0
MA013130658	m	30	SOR	36.8	0	0	0	0	0
MA013130660	f	20	SOR	36.1	0	0	0	0	0
MA013130664	f	27	SOR	37.4	0	0	0	0	0
MA013130666	f	39	SOR	37.1	0	0	0	0	0
MA013130670	m	10	SOR	36.8	0	0	0	0	0
MA013130672	f	21	SOR	37.4	0	0	0	0	0
MA013130674	m	50	SOR	37.2	0	0	0	0	0
MA013130676	m	18	SOR	36.9	0	0	0	0	0
MA013130678	f	32	SOR	36.8	0	0	0	0	0
MA013130680	m	27	SOR	36.3	0	0	0	0	0
MA013130682	f	18	SOR	37.7	0	0	0	0	0
MA013130684	f	22	SOR	36.3	0	0	0	0	0
MA013130686	m	36	SOR	36.9	0	0	0	0	0
MA013130688	m	20	SOR	37.2	0	0	0	0	0
MA013130690	m	36	SOR	36.6	0	0	0	0	0
MA013130694	f	27	SOR	37.8	1	0	1	1	1376
MA013130696	f	29	SOR	36.9	0	0	0	0	0
MA013130714	f	29	SOR	36.2	0	0	0	1	0
MA013130716	f	41	SOR	37.1	0	0	0	0	0
MA013130724	f	68	SOR	37	0	0	0	0	0
MA013130726	f	36	SOR	37.1	0	0	0	0	0
MA013130728	f	54	SOR	37.2	0	0	0	0	0
MA013130730	m	43	SOR	37.4	0	0	0	0	0
MA013130732	f	46	SOR	36.9	0	0	0	0	0
MA013130734	f	53	SOR	37.3	0	0	0	0	0
MA013130736	f	32	SOR	37.6	0	0	0	0	0
MA013130738	f	7	SOR	36.8	0	0	0	0	0
MA013130740	f	19	SOR	37.4	0	0	0	0	0
MA013130750	m	60	SOR	36.9	0	0	0	0	0
MA013130752	m	26	SOR	37	0	0	0	0	0
MA013130762	m	24	SOR	37.6	0	0	0	0	0
MA013130764	m	20	SOR	37.2	0	0	0	0	0
MA013130766	f	18	SOR	37	0	0	0	0	0
MA013130768	f	30	SOR	37.2	0	0	0	0	0
MA013130772	m	40	SOR	36.9	0	0	0	0	0
MA013130776	f	46	SOR	37.4	0	0	0	0	0
MA013130778	m	42	SOR	37.1	1	0	0	1	0
MA013130782	f	18	SOR	37.5	0	0	0	0	0
MA013130788	m	29	SOR	37.1	0	0	0	0	0
MA013130792	f	62	SOR	37.3	0	0	0	0	0
MA013130802	m	27	SOR	37.2	0	0	0	0	0
MA013130804	m	34	SOR	37	0	0	0	0	0
MA013130808	f	38	SOR	37.5	0	0	0	0	0
MA013130810	f	25	SOR	36.7	0	0	0	0	0
MA013130812	f	27	SOR	37	0	0	0	0	0
MA0131308014	f	34	SOR	36.7	0	0	0	0	0
MA013130818	f	68	SOR	37.1	0	0	0	0	0
MA013130820	m	67	SOR	37.4	0	0	0	0	0
MA013130822	m	42	SOR	37.2	0	0	0	0	0
MA013130824	m	40	SOR	37.2	0	0	0	0	0
MA013130826	f	43	SOR	37.1	0	0	0	0	0
MA013130828	m	20	SOR	36.8	0	0	0	0	0
MA013130830	m	57	SOR	37.1	0	0	0	0	0
MA013130852	f	19	SOR	37.1	0	0	0	0	0
MA013130191	f	47	GS	37.1	1	1	1	1	4371
MA013130192	f	27	SOR	37	1	1	1	1	16440
MA013130193	f	40	GS	38.9	1	1	1	1	64480
MA013130194	m	20	SOR	37.3	1	1	1	1	8448
MA013130195	m	14	GS	37.5	1	1	1	1	20534
MA013130196	m	20	SOR	36.9	1	1	1	1	2640
MA013130198	m	26	SOR	36.9	1	1	1	1	37013
MA013130200	m	19	SOR	36.8	1	1	1	1	67360
MA013130202	m	30	SOR	37.8	1	1	1	1	94560
MA013130203	m	8	GS	37.5	1	1	1	1	10022
MA013130205	m	63	GS	36.6	1	1	1	1	28947
MA013130207	m	7	GS	36.6	1	1	1	1	34900
MA013130209	m	75	GS	39	1	1	1	1	2906
MA013130211	f	14	GS	38.2	1	1	1	1	59494
MA013130212	m	20	SOR	37.8	1	1	1	1	11440
MA013130213	f	22	GS	37.6	1	1	1	1	24005
MA013130215	m	52	GS	37.7	1	1	1	1	148687
MA013130217	m	12	GS	39	1	1	1	1	1863
MA013130219	m	19	GS	38	1	1	1	1	6482
MA013130221	m	11	GS	37	1	1	1	1	1416
MA013130222	m	35	SOR	39.1	1	1	1	1	76832
MA013130224	m	32	SOR	38.2	1	1	1	1	22128
MA013130225	m	25	GS	38	1	1	1	1	848
MA013130228	m	67	SOR	38.5	0	1	1	1	120
MA013130229	m	70	GS	37	1	1	1	1	1145
MA013130231	f	18	GS	38.5	1	1	1	1	6000
MA013130234	m	8	SOR	38.3	1	1	1	1	6976
MA013130235	f	16	GS	37.9	1	1	1	1	11848
MA013130236	f	12	SOR	37.8	1	1	1	1	24688
MA013130237	m	28	GS	38.3	1	1	1	1	9541
MA013130238	m	75	SOR	37.7	1	1	1	1	21376
MA013130239	f	35	GS	37.1	1	1	1	1	15944
MA013130241	f	13	GS	38.4	1	1	1	1	28848
MA013130242	m	21	SOR	38.7	1	1	1	1	36615
MA013130244	m	21	SOR	37.1	1	1	1	1	23333
MA013130248	f	40	SOR	37.5	1	1	1	1	1675
MA013130250	m	35	SOR	37.2	1	1	1	1	6624
MA013130252	f	25	SOR	36.9	0	1	1	1	7808
MA013130253	f	49	GS	37.5	1	1	1	1	7389
MA013130254	f	22	SOR	38	1	1	1	1	6576
MA013130256	m	40	SOR	37.8	1	1	1	1	2584
MA013130257	m	22	GS	38.6	1	1	1	1	10488
MA013130259	m	28	GS	37.9	1	1	1	1	191
MA013130260	m	30	SOR	38.2	1	1	1	1	8720
MA013130267	m	16	GS	40.1	1	1	1	1	67736
MA013130275	f	50	GS	37	0	1	1	1	2072
MA013130282	m	11	SOR	36.9	1	1	1	1	2700
MA013130288	m	19	SOR	38.2	1	1	1	1	6069
MA013130290	f	36	SOR	37.4	1	1	1	1	9408
MA013130291	f	30	GS	36.7	1	1	1	1	680
MA013130296	f	8	SOR	37.9	1	1	1	1	16160
MA013130297	f	32	GS	37.9	1	1	1	1	277
MA013130298	m	19	SOR	37.6	1	1	1	1	17088
MA013130299	f	30	GS	37.3	1	1	1	1	1970
MA013130300	m	36	SOR	38.1	1	1	1	1	14747
MA013130301	f	7	GS	38	1	1	1	1	1513
MA013130306	f	36	SOR	37.6	1	1	1	1	35131
MA013130308	m	56	SOR	38.1	1	1	1	1	19445
MA013130309	f	33	GS	37.1	1	1	1	1	1071
MA013130310	f	63	SOR	37.9	1	1	1	1	7813
MA013130315	m	20	GS	37.9	1	1	1	1	24261
MA013130316	m	41	SOR	38.2	1	1	1	1	3536
MA013130318	m	24	SOR	37.1	1	1	1	1	30976
MA013130319	m	19	GS	37.3	1	1	1	1	42728
MA013130320	m	39	SOR	38	1	1	1	1	3648
MA013130324	f	54	SOR	38.4	1	1	1	1	3636
MA013130327	m	23	GS	37.5	1	1	1	1	20971
MA013130330	m	47	SOR	37.6	1	1	1	1	2540
MA013130331	f	50	GS	37.6	1	1	1	1	7983
MA013130332	m	19	SOR	38.3	1	1	1	1	15285
MA013130335	m	26	GS	38	1	1	1	1	9514
MA013130336	m	32	SOR	37.2	1	1	1	1	944
MA013130339	f	70	GS	40.1	1	1	1	1	3352
MA013130342	f	30	SOR	37.9	1	1	1	1	5504
MA013130343	f	18	GS	38	1	1	1	1	3696
MA013130344	f	25	SOR	37.8	1	1	0	1	0
MA013130350	f	24	SOR	37.1	1	1	1	1	14496
MA013130351	f	13	GS	37.4	1	1	1	1	128393
MA013130352	m	23	SOR	38.3	1	1	1	1	15744
MA013130358	m	19	SOR	38	0	1	1	1	488
MA013130360	m	30	SOR	37.7	1	1	1	1	13808
MA013130366	f	34	SOR	36.8	1	1	1	1	10717
MA013130367	m	23	GS	38.9	1	1	1	1	2160
MA013130372	m	36	SOR	38.5	1	1	1	1	17360
MA013130373	f	5	GS	38	1	1	1	1	5520
MA013130375	m	26	GS	37.5	1	1	1	1	15927
MA013130377	f	19	GS	37.7	1	1	1	1	3224
MA013130382	m	40	SOR	37.7	0	1	1	1	176
MA013130384	m	35	SOR	38.1	1	1	1	1	8619
MA013130388	m	22	SOR	38.1	1	1	1	1	6112
MA013130391	m	70	GS	36.5	0	1	1	1	675
MA013130392	m	28	SOR	38.1	1	1	1	1	58080
MA013130394	m	45	SOR	37.7	1	1	1	1	25147
MA013130396	m	30	SOR	37.8	1	1	1	1	16633
MA013130398	m	26	SOR	37.7	1	1	1	1	304
MA013130400	m	34	SOR	37.8	1	1	1	1	3152
MA013130402	f	27	SOR	38.2	1	1	1	1	21851
MA013130405	m	19	GS	37.3	1	1	1	1	18970
MA013130410	m	30	SOR	37.9	1	1	1	1	49760
MA013130412	m	26	SOR	38.1	1	1	1	1	17600
MA013130416	m	32	SOR	37.9	1	1	1	1	4376
MA013130420	f	18	SOR	37.3	1	1	1	1	3205
MA013130429	f	20	GS	39.9	1	1	1	1	17284
MA013130436	f	60	SOR	37.6	1	1	1	1	10720
MA013130438	m	7	SOR	38.2	1	1	1	1	9328
MA013130439	f	30	GS	37.2	1	1	1	1	1419
MA013130440	m	23	SOR	37.9	1	1	1	1	280
MA013130441	m	18	GS	36.3	1	1	1	1	6169
MA013130444	f	50	SOR	38	1	1	1	1	1632
MA013130446	m	38	SOR	38	1	1	1	1	15856
MA013130449	f	48	GS	38.9	1	1	1	1	24951
MA013130459	m	19	GS	38.4	1	1	1	1	23114
MA013130461	m	20	GS	37.8	1	1	1	1	12792
MA013130466	m	6	SOR	37.4	1	1	0	1	0
MA013130467	m	19	GS	38.9	1	1	1	1	7115
MA013130472	m	45	SOR	37.9	1	1	1	1	6976
MA013130476	m	30	SOR	36.8	0	1	1	1	3464
MA013130477	f	19	GS	39.1	1	1	1	1	84709
MA013130478	m	40	SOR	37.8	0	1	0	0	0
MA013130480	f	6	SOR	38	1	1	1	1	19232
MA013130482	m	8	SOR	37.8	1	1	1	1	34427
MA013130484	m	33	SOR	37.8	1	1	1	1	26263
MA013130486	m	10	SOR	38.1	1	1	1	1	15710
MA013130488	f	20	SOR	37.9	1	1	1	1	26485
MA013130492	f	23	SOR	37.8	1	1	1	1	595
MA013130493	m	70	GS	39.2	1	1	1	1	398
MA013130494	f	43	SOR	38.2	1	1	1	1	2720
MA013130496	f	41	SOR	37	1	1	1	1	1848
MA013130499	m	25	GS	38.6	1	1	1	1	83075
MA013130520	m	33	SOR	38.7	1	1	1	1	3456
MA013130538	m	25	SOR	37.9	1	1	1	1	8608
MA013130540	m	39	SOR	36.8	0	1	0	1	0
MA013130544	m	20	SOR	37.9	1	1	1	1	33819
MA013130546	f	9	SOR	36.6	0	1	0	0	0
MA013130551	m	20	GS	38.2	1	1	1	1	10837
MA013130552	m	18	SOR	37.3	1	1	1	1	5936
MA013130554	m	30	SOR	38	1	1	1	1	25632
MA013130556	m	41	SOR	38.9	1	1	1	1	55080
MA013130576	f	18	SOR	37.9	1	1	1	1	25531
MA013130582	m	21	SOR	37.8	1	1	1	1	2709
MA013130588	f	20	SOR	37.9	1	1	1	1	3440
MA013130592	m	34	SOR	37.3	1	1	1	1	8128
MA013130602	f	41	SOR	37.6	1	1	1	1	34837
MA013130628	m	33	SOR	37.8	1	1	1	1	75648
MA013130630	f	62	SOR	38.2	1	1	1	1	15376
MA013130638	m	41	SOR	38.2	1	1	1	1	8368
MA013130642	m	26	SOR	37.9	1	1	1	1	1679
MA013130644	f	37	SOR	38.1	1	1	1	1	16192
MA013130656	m	20	SOR	38.1	1	1	1	1	80
MA013130662	m	30	SOR	37.8	1	1	1	1	16826
MA013130668	m	44	SOR	37.7	1	1	1	1	29675
MA013130692	m	9	SOR	38	1	1	1	1	1467
MA013130698	m	43	SOR	37.6	1	1	1	1	4277
MA013130700	f	48	SOR	37.1	1	1	1	1	3904
MA013130702	m	17	SOR	38.1	1	1	1	1	16656
MA013130704	m	21	SOR	39.8	1	1	1	1	30256
MA013130706	f	19	SOR	37.3	1	1	1	1	4543
MA013130708	f	33	SOR	37.2	1	1	1	1	2728
MA013130710	m	52	SOR	37.1	1	1	1	1	3048
MA013130712	f	46	SOR	36.7	1	1	1	1	11968
MA013130718	m	25	SOR	37.5	1	1	1	1	3752
MA013130720	m	38	SOR	37.6	1	1	1	1	42848
MA013130722	m	29	SOR	37.2	1	1	1	1	12536
MA013130742	m	18	SOR	37.9	1	1	1	1	37397
MA013130744	f	19	SOR	37.7	1	1	1	1	464
MA013130746	m	27	SOR	38	1	1	1	1	14485
MA013130748	m	28	SOR	37.8	1	1	1	1	48395
MA013130756	f	22	SOR	38.2	1	1	1	1	31915
MA013130758	f	20	SOR	37.7	1	1	1	1	12821
MA013130760	m	21	SOR	37.8	1	1	1	1	47931
MA013130770	f	19	SOR	37.3	1	1	1	1	26238
MA013130774	m	21	SOR	38.4	1	1	1	1	4048
MA013130780	m	37	SOR	37.6	1	1	1	1	3248
MA013130784	f	38	SOR	37.8	1	1	1	1	6693
MA013130786	f	31	SOR	37.6	1	1	1	1	8304
MA013130790	m	35	SOR	37.1	1	1	1	1	6832
MA013130794	m	39	SOR	38.2	1	1	1	1	8128
MA013130796	m	19	SOR	37.2	1	1	1	1	19957
MA013130798	f	24	SOR	37.6	1	1	1	1	15696
MA013130800	m	37	SOR	36.9	0	1	0	1	0
MA013130806	m	18	SOR	37.9	1	1	1	1	20981
MA013130816	m	72	SOR	37.3	1	1	1	1	15776
MA013130832	f	24	SOR	37.5	1	1	1	1	13632
MA013130834	m	29	SOR	37.1	1	1	1	1	2192
MA013130836	m	18	SOR	38	1	1	1	1	2200
MA013130838	m	27	SOR	37.6	1	1	1	1	1531
MA013130840	f	21	SOR	38.1	1	1	1	1	5429
MA013130842	m	38	SOR	37.6	1	1	1	1	8800
MA013130844	m	43	SOR	37.4	1	1	1	1	119531
MA013130846	m	47	SOR	37.8	1	1	1	1	4728
MA013130848	f	39	SOR	37.6	1	1	1	1	11376
MA013130850	f	50	SOR	37.7	1	1	1	1	45120
MA013130854	m	28	SOR	37.9	1	1	1	1	31360
MA013130856	m	22	SOR	38	1	1	1	1	7040
MA013130858	f	30	SOR	37.6	1	1	1	1	1536
MA013130860	m	40	SOR	37.9	1	1	1	1	8608
MA013130862	m	20	SOR	38.7	1	1	1	1	9232
MA013130864	m	40	SOR	37.4	1	1	1	1	162000
MA013130270	f	38	SOR	36.6	0	1	1	1	949
